# Supplementary material
Source: publisher figshare collection journal article supplement (https://acs.figshare.com/ndownloader/files/22046511)
Supplement: Supplementary file 1 [file 22046511]

## Supporting Information

### **Acetal-Functionalized Pillar[5]arene: a pH-Responsive and Versatile Nanomaterial for the Delivery of Chemotherapeutic Agents**

Shang Lan, Yamin Liu, Kejia Shi and Da Ma\*

*Department of Chemistry, Fudan University, 220 Handan Road, Shanghai 200433, China*

\*Email: dama@fudan.edu.cn

#### **Table of Contents**

|                                                             |     |
|-------------------------------------------------------------|-----|
| 1. Experimental procedures .....                            | S2  |
| 2. Host-Guest interaction .....                             | S14 |
| 3. FT-IR spectra .....                                      | S15 |
| 4. Morphology and size distributions of nanoparticles ..... | S16 |
| 5. Time-dependent size change of nanoparticles .....        | S17 |
| 6. References .....                                         | S18 |

## 1. Experimental procedures

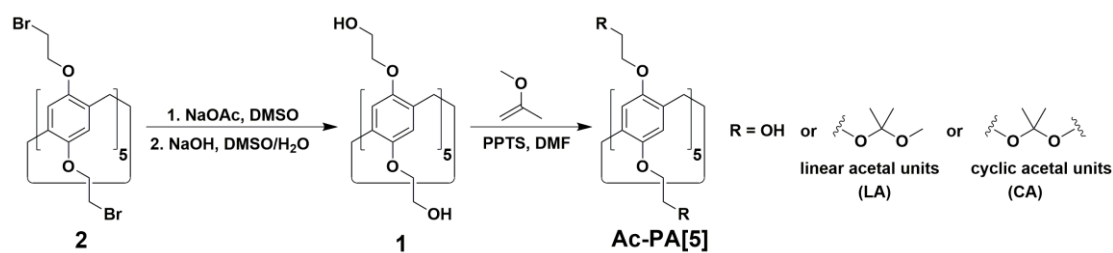

### 1.1 Synthesis of Ac-PA[5].

**Synthesis of host 1:** Host **2** was first synthesized according to reported literature procedures.<sup>1</sup> NaOAc (1.23 g, 15 mmol) was added into a solution of host **2** (1.68 g, 1 mmol) in DMSO (50 mL). The mixture was stirred at 90 °C for 3 h. Aqueous NaOH (15 mL, 15 mmol) was added to the reaction mixture and stirred for 30 min. The reaction mixture was poured into H<sub>2</sub>O, the product was collected by centrifugation at 10 000 rpm, then rinsed with H<sub>2</sub>O (3 × 30 mL). The product was recrystallized from methanol to obtain host **1** as a white solid (540 mg, 51%). <sup>1</sup>H NMR (400 MHz, MeOD)  $\delta$  (ppm): 6.95 (s, 10H), 3.95 (t,  $J$  = 4.7 Hz, 20H), 3.88 (t,  $J$  = 4.8 Hz, 20H), 3.82 (s, 10H). <sup>13</sup>C NMR (100 MHz, MeOD)  $\delta$  (ppm): 151.16, 130.33, 116.05, 71.35, 62.19, 30.17.

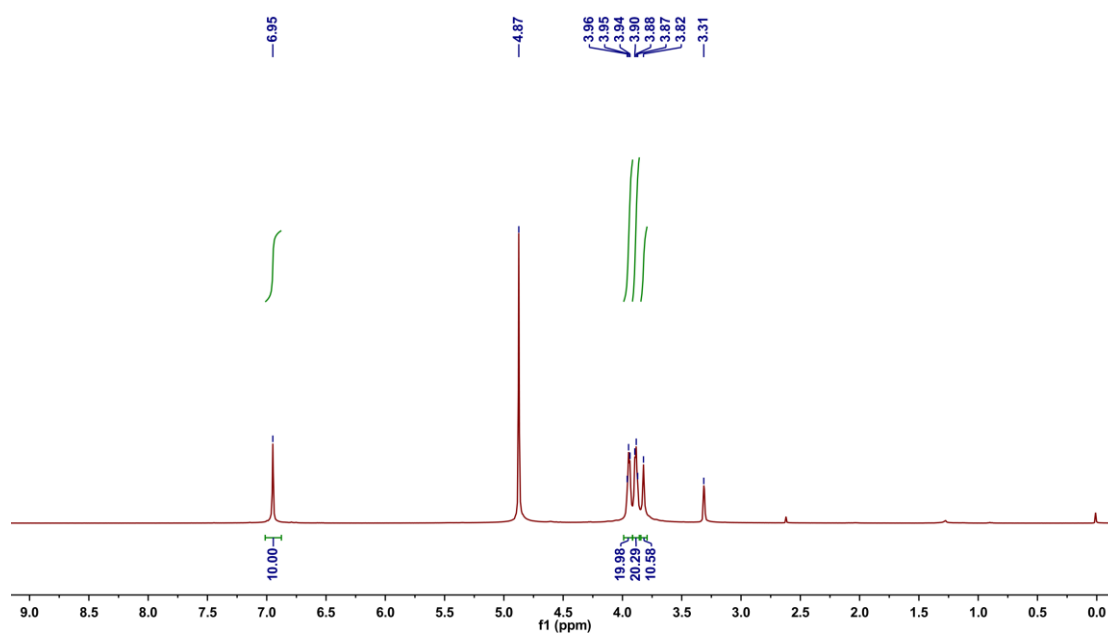

**Figure S1.** <sup>1</sup>H NMR spectrum (400 MHz, MeOD) of host **1**.

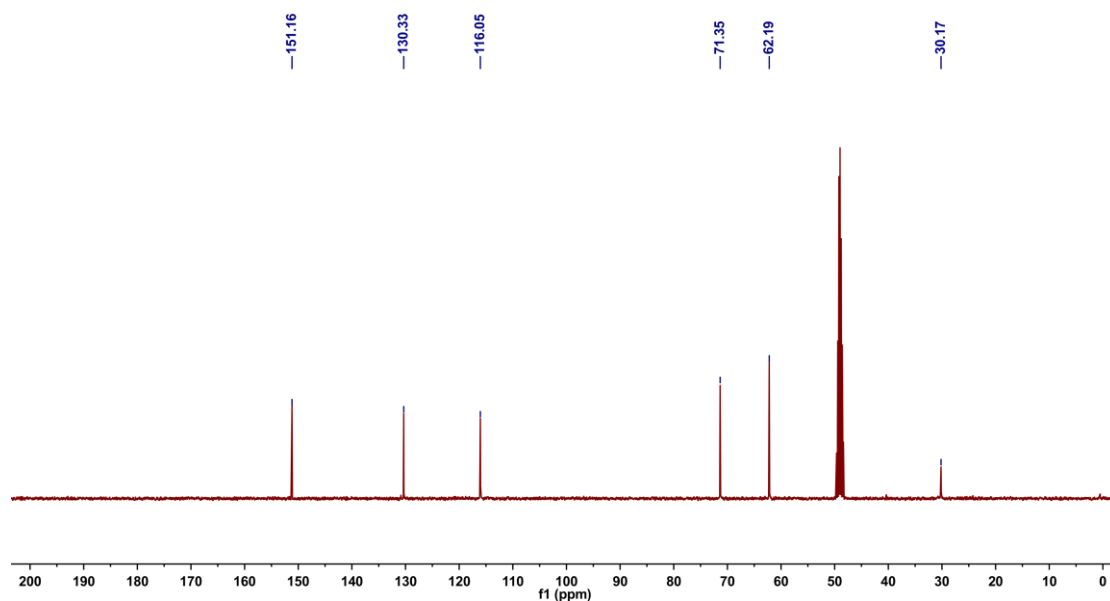

**Figure S2.**  $^{13}\text{C}$  NMR spectrum (100 MHz, MeOD) of host **1**.

**Synthesis of *Ac-PA[5]<sup>2</sup>*:** A flame-dried flask was charged with host **1** (1.05 g, 1 mmol) and purged with  $\text{N}_2$ . Anhydrous DMF (50 mL) was added and the resulting mixture was stirred until host **1** was completely dissolved. Pyridium *p*-toluenesulfonate (25 mg, 0.1 mmol) was added followed by 2-methoxypropene (1.9 mL, 20 mmol). The system was maintained under positive  $\text{N}_2$  pressure and then sealed. After 3 h, the reaction was quenched with trimethylamine (0.5 mL). The product was precipitated with  $\text{H}_2\text{O}$  and isolated by centrifugation. The resulting product was washed thoroughly with  $\text{H}_2\text{O}$  and lyophilized to obtain **Ac-PA[5]** as a white powder (0.73 g).

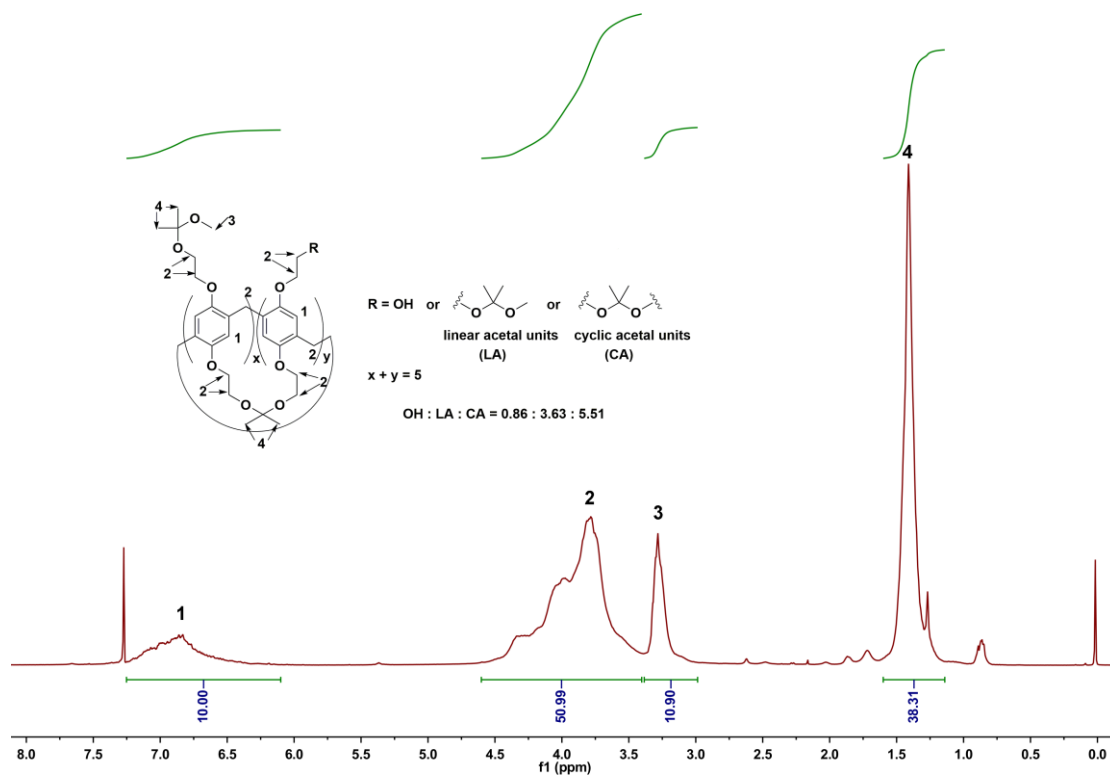

**Figure S3.**  $^1\text{H}$  NMR spectrum (400 MHz,  $\text{CDCl}_3$ ) recorded for **Ac-PA[5]**.

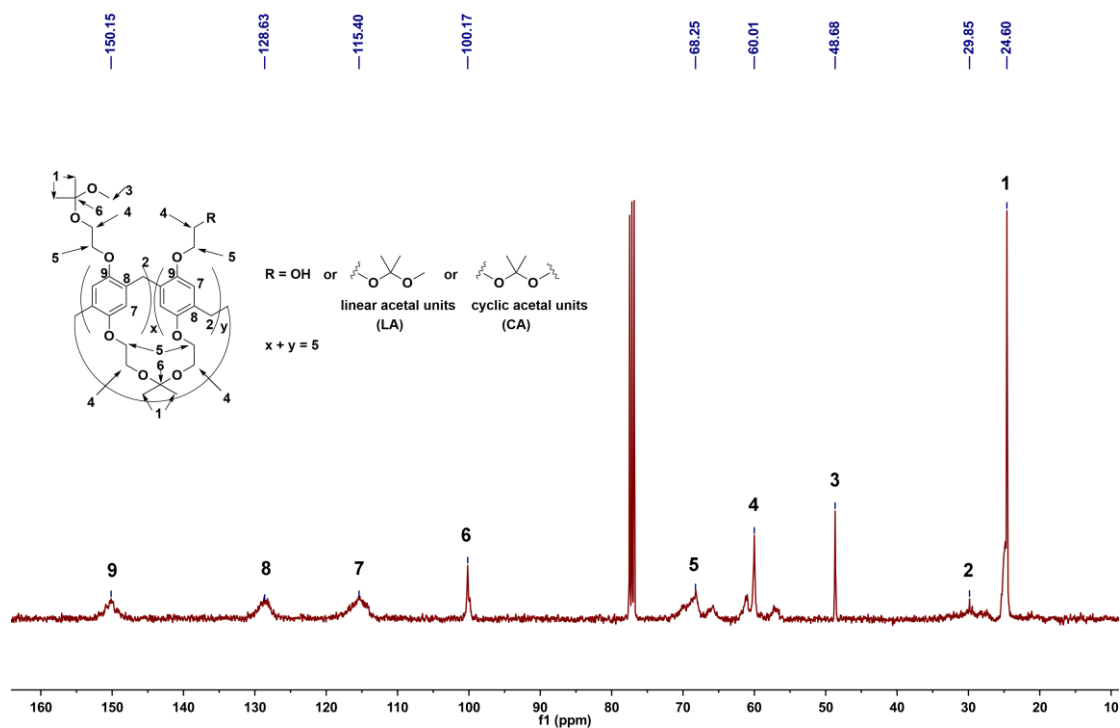

**Figure S4.**  $^{13}\text{C}$  NMR spectrum (100 MHz,  $\text{CDCl}_3$ ) recorded for **Ac-PA[5]**.

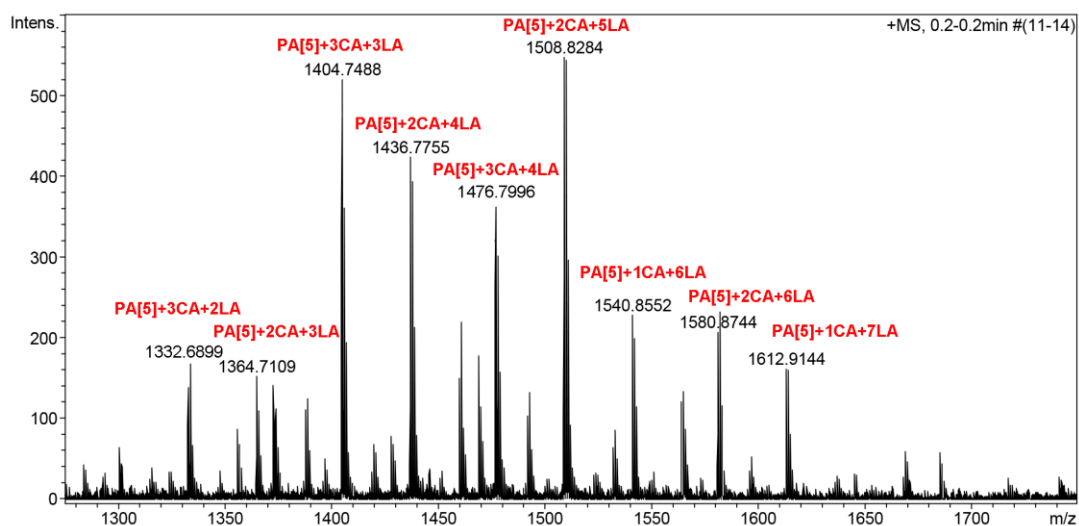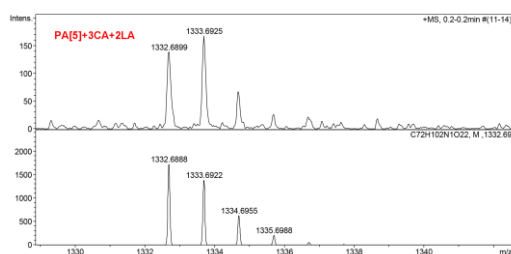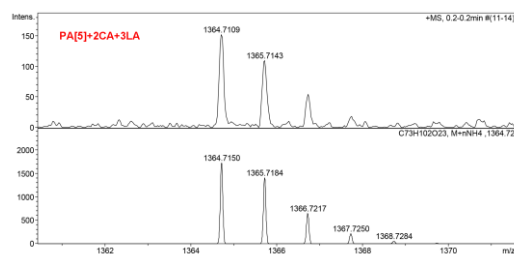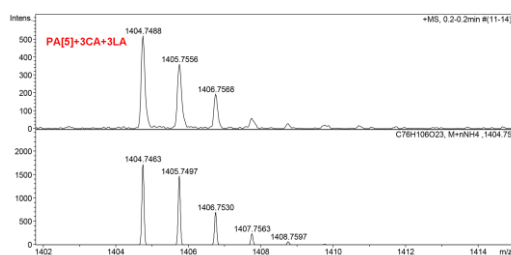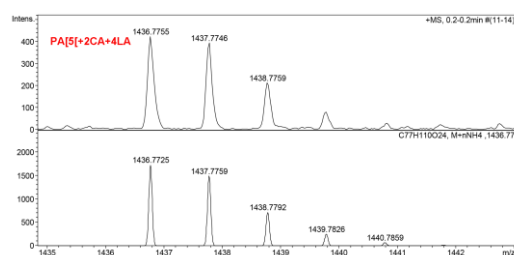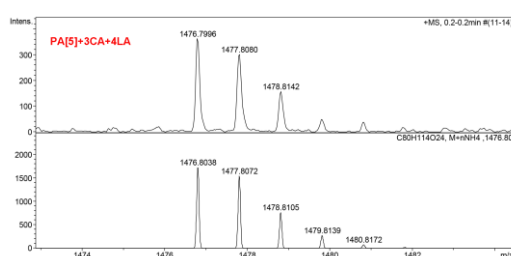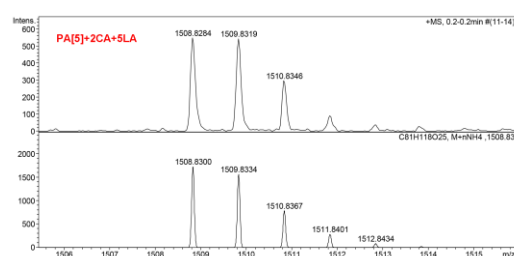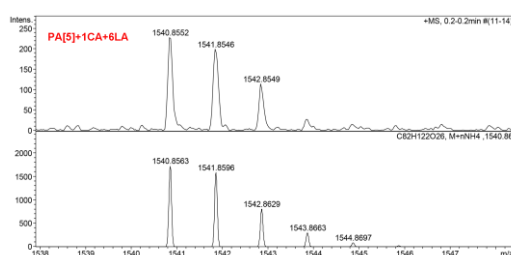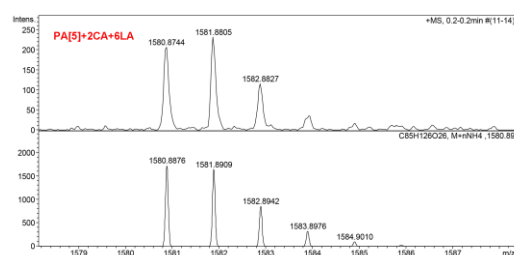

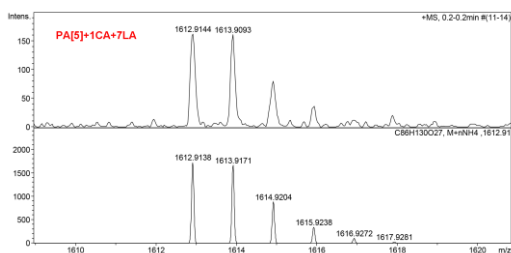

**Figure S5.** Electrospray ionization mass spectra of **Ac-PA[5]**.

**Note:** In the mass spectra of **Ac-PA[5]**, LA = linear acetal units, CA = cyclic acetal units, PA[5]+*m*CA+*n*LA represents the number of CA and LA unit in acetalated PA[5] molecule is *m* and *n*, respectively.

| molecules         | Experimental[M+NH <sub>4</sub> ] <sup>+</sup> | Calculated [M+NH <sub>4</sub> ] <sup>+</sup> | Error (ppm) |
|-------------------|-----------------------------------------------|----------------------------------------------|-------------|
| PA[5] + 1CA + 6LA | 1540.8552                                     | 1540.8563                                    | 0.7         |
| PA[5] + 1CA + 7LA | 1612.9144                                     | 1612.9138                                    | 0.4         |
| PA[5] + 2CA + 3LA | 1364.7109                                     | 1364.7150                                    | 3.0         |
| PA[5] + 2CA + 4LA | 1436.7755                                     | 1436.7725                                    | 2.1         |
| PA[5] + 2CA + 5LA | 1508.8284                                     | 1508.8300                                    | 1.1         |
| PA[5] + 2CA + 6LA | 1580.8744                                     | 1580.8876                                    | 8.3         |
| PA[5] + 3CA + 2LA | 1332.6899                                     | 1332.6888                                    | 0.8         |
| PA[5] + 3CA + 3LA | 1404.7488                                     | 1404.7463                                    | 1.8         |
| PA[5] + 3CA + 4LA | 1476.7996                                     | 1476.8038                                    | 2.8         |

**Table S1** Experimental and calculated E/Z values found for **Ac-PA[5]** and corresponding error (ppm).

## 1.2 Synthesis of FITC-Py and FA-Py.

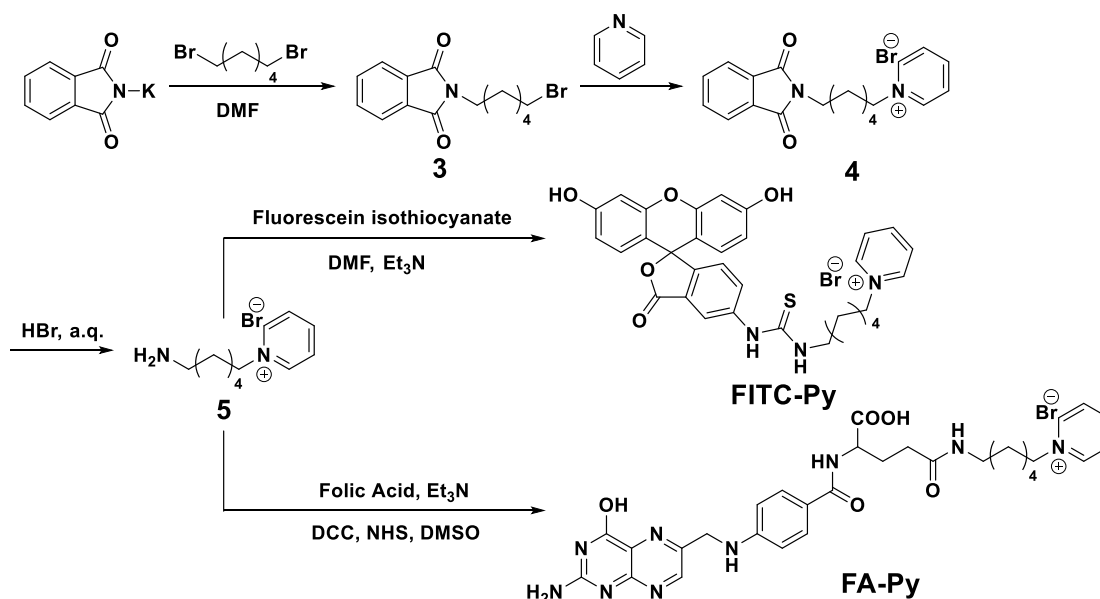

**Synthesis of compound 3<sup>3</sup>:** A solution of 1,6-dibromohexane (12.25 g, 50 mmol) and potassium phthalimide (1.86 g, 10 mmol) in DMF (10 mL) was stirred at 90 °C for 24 h. After the mixture was cooled to room temperature, the solvent was removed by reduced pressure. The crude mixture was purified by column chromatography on silica gel to give a white solid (2.76 g, 89%). <sup>1</sup>H NMR (400 MHz, CDCl<sub>3</sub>) δ (ppm): 7.84 (dd, *J* = 5.4, 3.1 Hz, 2H), 7.71 (dd, *J* = 5.5, 3.0 Hz, 2H), 3.68 (t, *J* = 7.2 Hz, 2H), 3.39 (t, *J* = 6.8 Hz, 2H), 1.89 - 1.82 (m, 2H), 1.73 - 1.66 (m, 2H), 1.52 - 1.45 (m, 2H), 1.41 - 1.33 (m, 2H). <sup>13</sup>C NMR (100 MHz, CDCl<sub>3</sub>) δ (ppm): 168.58, 134.03, 132.29, 123.33, 37.98, 33.79, 32.74, 28.54, 27.84, 26.16.

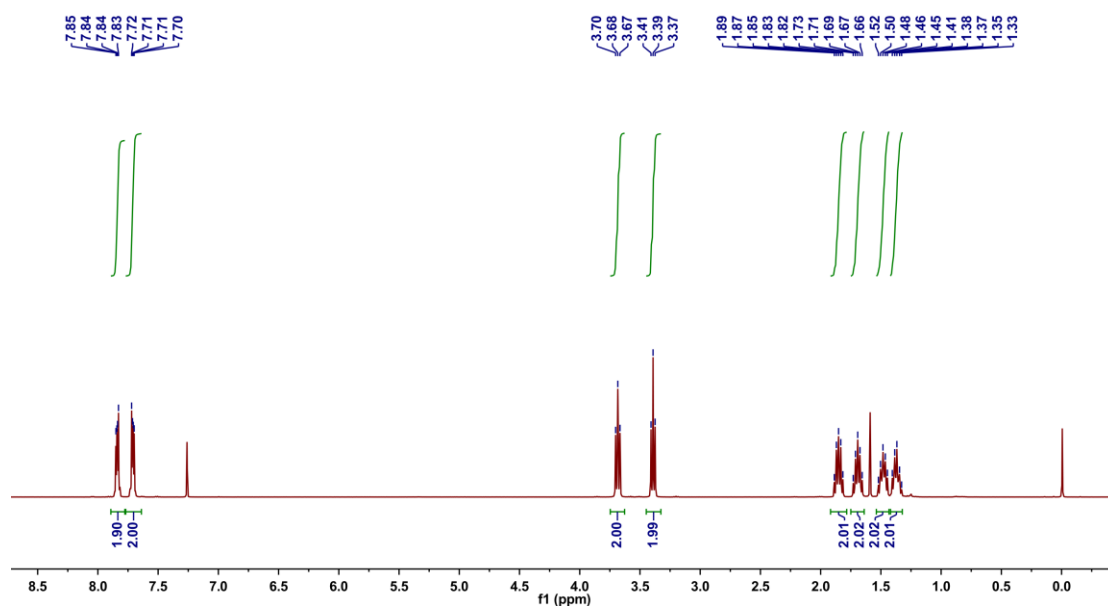

**Figure S6.** <sup>1</sup>H NMR spectrum (400 MHz, CDCl<sub>3</sub>) recorded for compound 3.

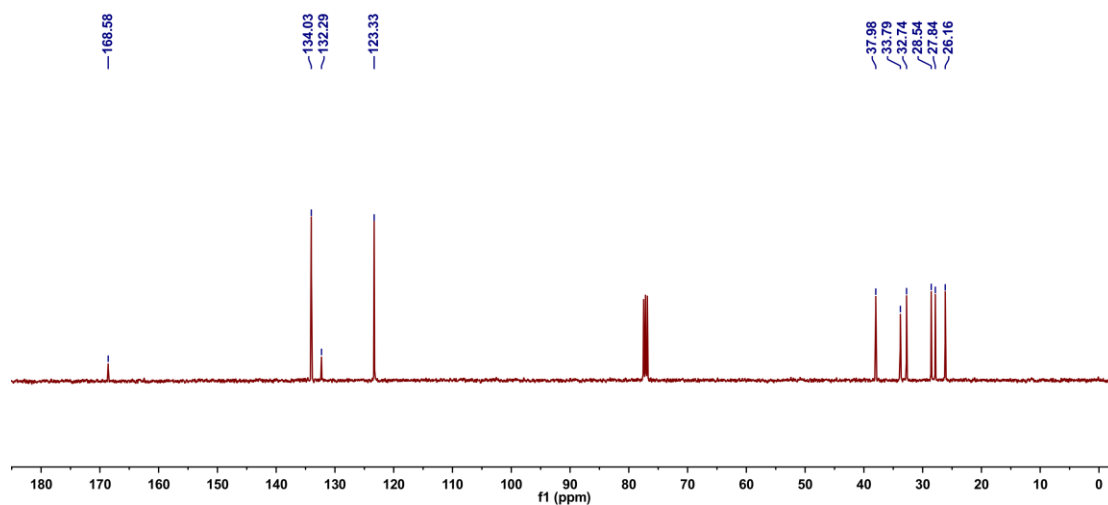

**Figure S7.** <sup>13</sup>C NMR spectrum (100 MHz, CDCl<sub>3</sub>) recorded for compound 3.

**Synthesis of compound 4<sup>3</sup>:** Compound **3** (3.11 g, 10 mmol) was dissolved in dry pyridine (10 mL), and the resulting solution was heated to reflux for 3 h. After cooling to room temperature, the mixture was poured into diethyl ether (30 mL). The product was collected by centrifugation and washed with diethyl ether (3 × 30 mL) to give a white solid (3.7 g, 95%). <sup>1</sup>H NMR (400 MHz, D<sub>2</sub>O)  $\delta$  (ppm): 8.87 (d,  $J$  = 6.0 Hz, 2H), 8.55 (t,  $J$  = 7.9 Hz, 1H), 8.08 (t,  $J$  = 7.0 Hz, 2H), 7.74 (dd,  $J$  = 5.6, 3.1 Hz, 2H), 7.67 (dd,  $J$  = 5.8, 2.9 Hz, 2H), 4.63 (t,  $J$  = 7.3 Hz, 2H), 3.52 (t,  $J$  = 7.0 Hz, 2H), 2.06 - 1.98 (m, 2H), 1.61 - 1.54 (m, 2H), 1.41 - 1.28 (m, 4H). <sup>13</sup>C NMR (100 MHz, D<sub>2</sub>O)  $\delta$  (ppm): 170.39, 145.38, 144.01, 134.55, 130.92, 128.04, 123.05, 61.68, 37.41, 30.19, 27.18, 25.28, 24.61.

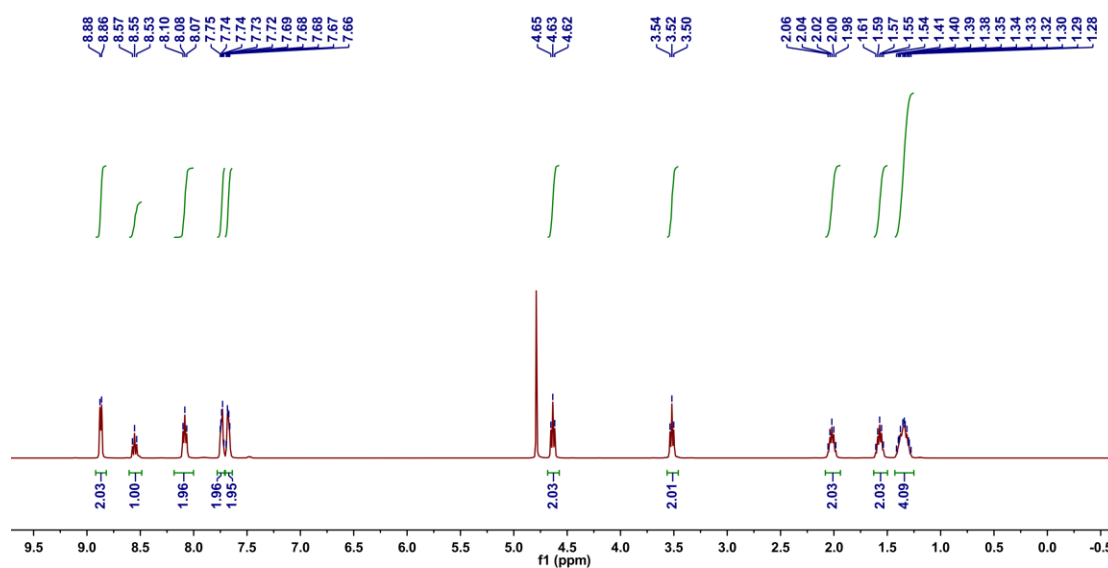

**Figure S8.** <sup>1</sup>H NMR spectrum (400 MHz, D<sub>2</sub>O) recorded for compound **4**.

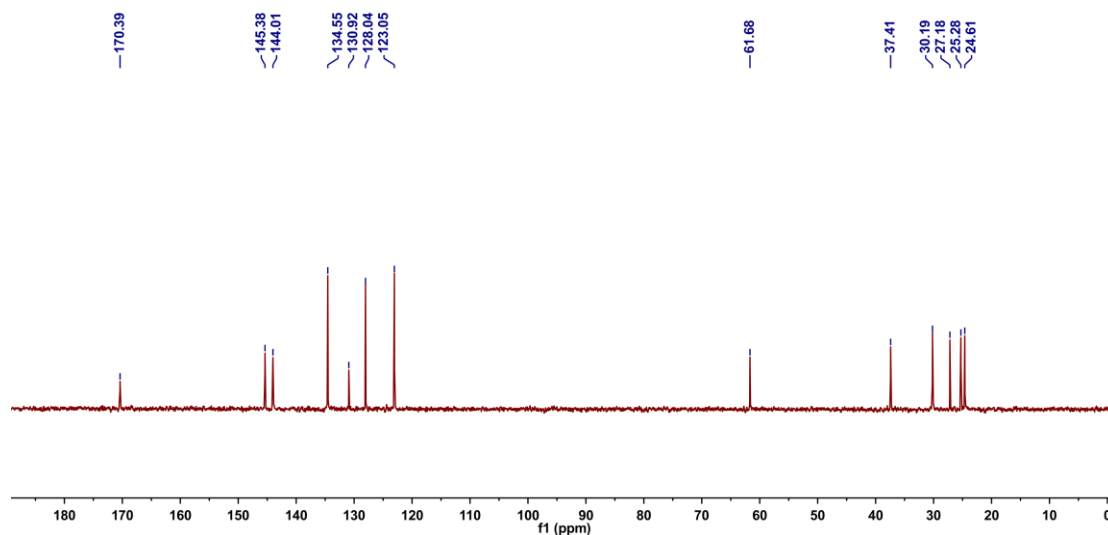

**Figure S9.** <sup>13</sup>C NMR spectrum (100 MHz, D<sub>2</sub>O) recorded for compound **4**.



**Synthesis of compound 5<sup>3</sup>:** Compound **4** (3.89 g, 10 mmol) was dissolved in 40% HBr solution (30 mL) and heated at reflux for 3 h. The mixture was cooled in an ice bath, and the precipitate was removed by filtration. The aqueous filtrate was poured into acetone (30 mL). The product was collected by centrifugation and washed with acetone (3 × 30 mL) to give a white solid (2.9 g, 85 %). <sup>1</sup>H NMR (400 MHz, D<sub>2</sub>O) δ (ppm): 8.83 (d, *J* = 6.0 Hz, 2H), 8.53 (t, *J* = 7.8 Hz, 1H), 8.05 (t, *J* = 7.0 Hz, 2H), 4.59 (d, *J* = 7.4 Hz, 2H), 2.96 (t, *J* = 7.6 Hz, 2H), 2.06 - 1.99 (m, 2H), 1.67 - 1.60 (m, 2H), 1.45 - 1.35 (m, 4H). <sup>13</sup>C NMR (100 MHz, D<sub>2</sub>O) δ (ppm): 145.30, 143.91, 127.98, 61.49, 39.10, 29.99, 26.14, 24.74, 24.47.

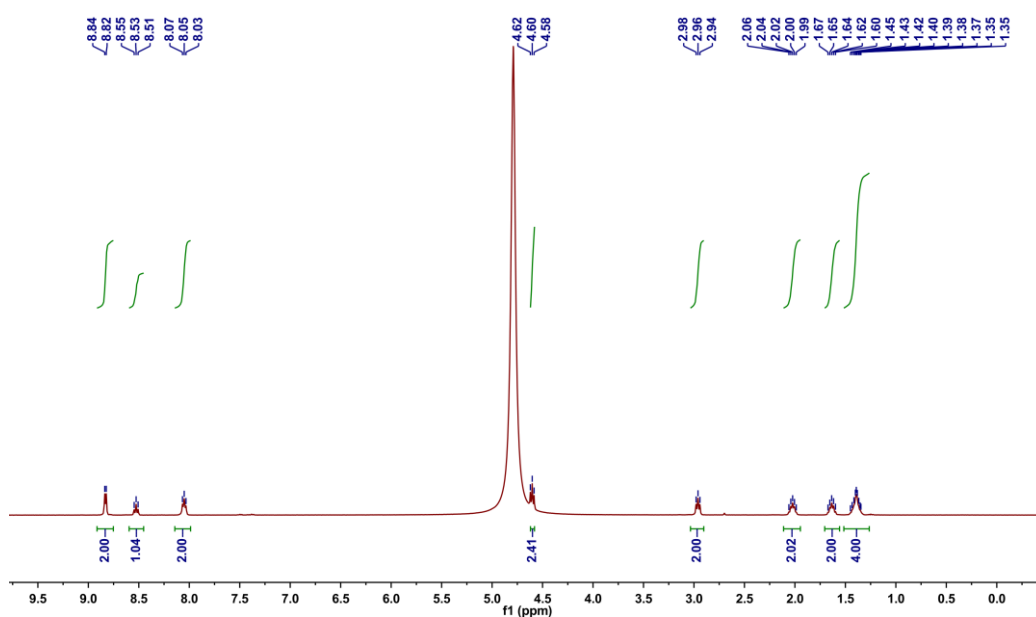

**Figure S10.** <sup>1</sup>H NMR spectrum (400 MHz, D<sub>2</sub>O) recorded for compound **5**.

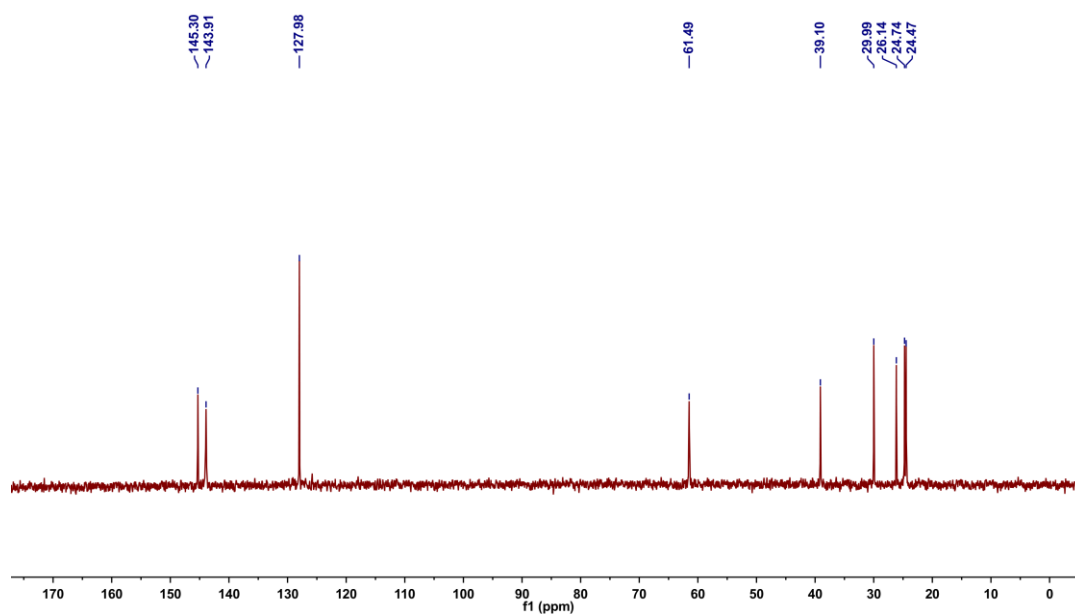

**Figure S11.** <sup>13</sup>C NMR spectrum (100 MHz, D<sub>2</sub>O) recorded for compound **5**.

**Synthesis of FITC-Py<sup>4</sup>:** Fluorescein isothiocyanate (389 mg, 1 mmol) and compound **5** (340 mg, 1 mmol) were dissolved in anhydrous DMF (25 mL). Et<sub>3</sub>N (200  $\mu$ L) was added and the mixture was stirred for 3 h at room temperature in the dark. Then, the mixture was poured into diethyl ether (100 mL) and the orange precipitate was collected by centrifugation and washed with diethyl ether (3  $\times$  30 mL) to give an orange solid (508 mg, 80 %). <sup>1</sup>H NMR (400 MHz, MeOD)  $\delta$  (ppm): 9.03 (d,  $J$  = 6.1 Hz, 2H), 8.59 (t,  $J$  = 7.8 Hz, 1H), 8.21 - 8.04 (m, 3H), 7.69 (d,  $J$  = 8.2 Hz, 1H), 7.17 (d,  $J$  = 8.3 Hz, 1H), 6.78 (d,  $J$  = 8.8 Hz, 2H), 6.68 (s, 2H), 6.56 (d,  $J$  = 8.8 Hz, 2H), 4.67 (t,  $J$  = 7.6 Hz, 2H), 3.63 (t,  $J$  = 7.1 Hz, 2H), 2.12 - 2.05 (m, 2H), 1.73 - 1.67 (m, 2H), 1.54 - 1.45 (m, 2H). <sup>13</sup>C NMR (100 MHz, MeOD)  $\delta$  (ppm): 182.64, 171.57, 164.88, 155.21, 146.85, 145.97, 142.20, 130.84, 130.44, 129.54, 126.97, 115.31, 112.48, 103.62, 63.04, 45.19, 32.34, 29.54, 27.17, 26.72. MS:  $m/z$  calcd for [M]<sup>+</sup> C<sub>32</sub>H<sub>30</sub>N<sub>3</sub>O<sub>5</sub>S, 568.1901, found 568.1916, error 2.6 ppm. FT-IR (cm<sup>-1</sup>): 3053m, 2936s, 2675s, 2490m, 1752s, 1608s, 1541s, 1501s, 1487s, 1460s, 1329s, 1255s, 1207m, 1176s, 1108s, 849m, 680m.

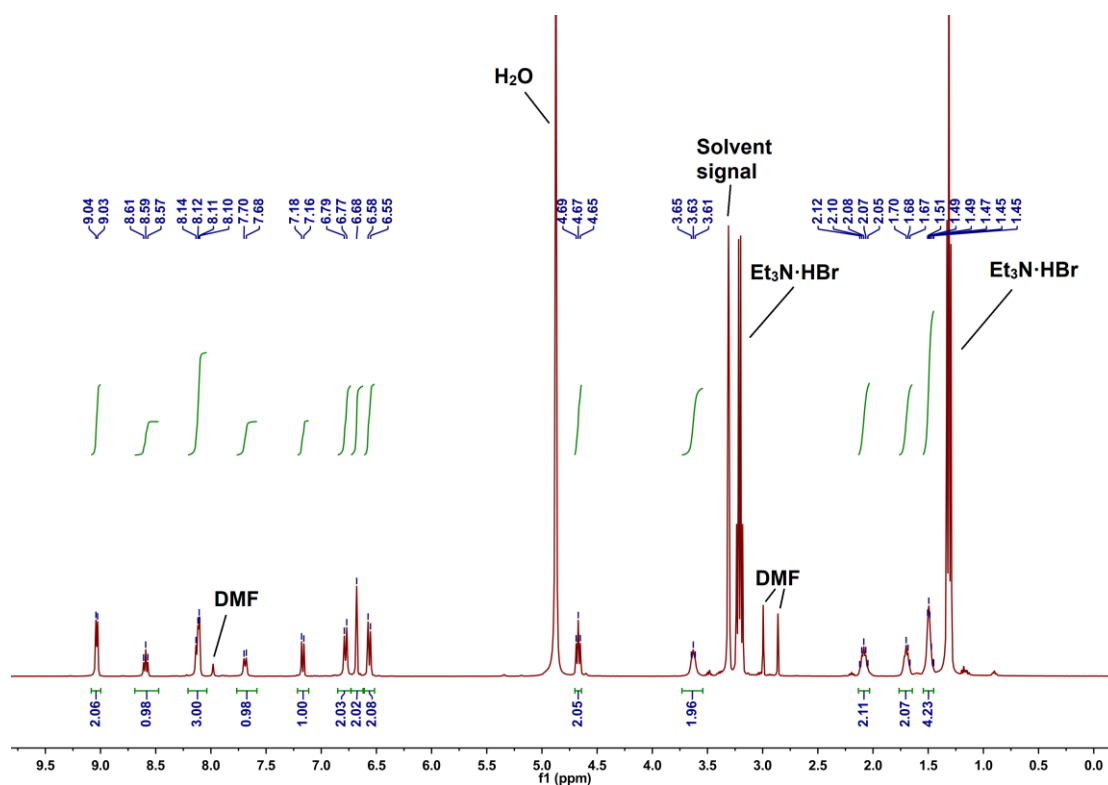

**Figure S12.** <sup>1</sup>H NMR spectrum (400 MHz, MeOD) recorded for FITC-Py.

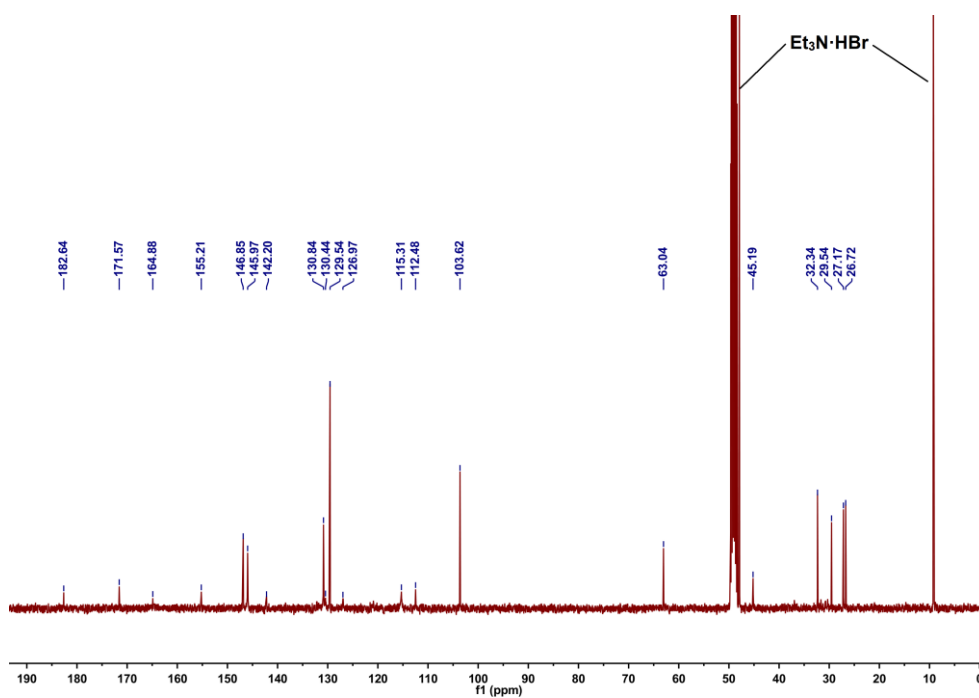

**Figure S13.**  $^{13}\text{C}$  NMR spectrum (100 MHz, MeOD) of FITC-Py.

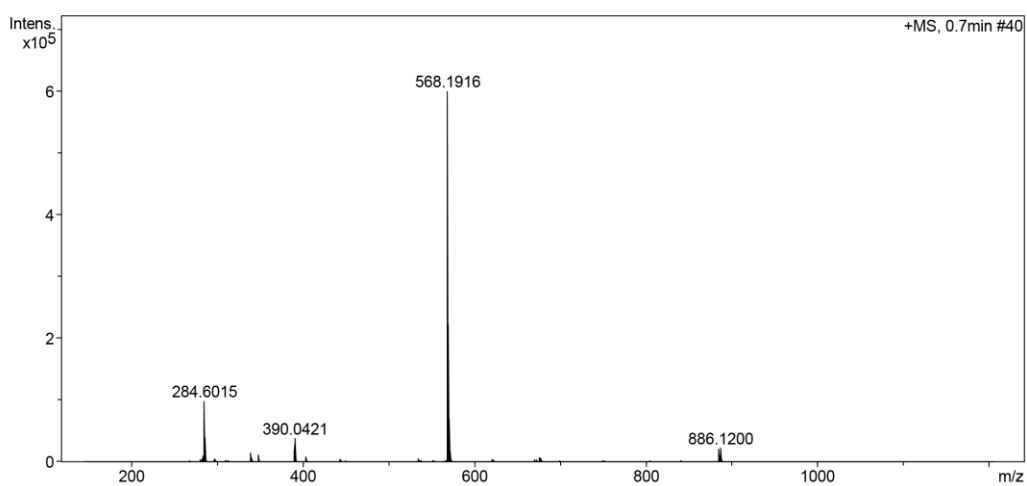

**Figure S14.** Electrospray ionization mass spectrum of FITC-Py.

**Synthesis of FA-Py<sup>5</sup>:** Folic acid (441 mg, 1 mmol) was activated by DCC (247 mg, 1.2 mmol) and NHS (230 mg, 2 mmol) in DMSO (20 mL) at 50 °C for 6 h. Compound **5** (340 mg, 1 mmol) and Et<sub>3</sub>N (200 μL) was added and the mixture was stirred for another 6 h at room temperature. The precipitate was removed by filtration and the filtrate was poured into acetone (30 mL). The product was collected by centrifugation and washed with acetone (3 × 30 mL) to give a pale yellow solid (566 mg, 83 %). <sup>1</sup>H NMR (400 MHz, DMSO) δ (ppm): 9.10 (d, *J* = 5.6 Hz, 2H), 8.64 (s, 1H), 8.60 (t, *J* = 8.0 Hz, 1H), 8.15 (t, *J* = 6.9 Hz, 2H), 8.10 - 7.95 (m, 1H), 7.82 (t, *J* = 5.8 Hz, 1H), 7.62 (d, *J* = 8.3 Hz, 2H), 7.17 (s, 2H), 6.95 (t, *J* = 6.2 Hz, 1H), 6.63 (d, *J* = 9.0 Hz, 2H), 4.63 - 4.53 (m, 2H), 4.53 - 4.40 (m, 2H), 4.34 - 4.20 (m, 1H), 3.04 - 2.97 (m, 2H), 2.34 - 2.21 (m, 1H), 2.18 - 2.14 (m, 1H), 2.06 - 1.75 (m, 4H), 1.39 - 1.18 (m, 6H). <sup>13</sup>C NMR (100 MHz, DMSO) δ (ppm): 174.34, 171.59, 166.12, 161.24, 156.28, 154.13, 150.71, 148.55, 145.46, 144.72, 128.84, 128.09, 127.95, 121.52, 111.21, 60.70, 52.60, 45.93, 38.19, 32.10, 30.61, 28.76, 27.06, 25.65, 25.05. MS: *m/z* calcd for [M]<sup>+</sup> C<sub>30</sub>H<sub>36</sub>N<sub>9</sub>O<sub>5</sub>, 602.2834, found 602.2814, error 3.3 ppm. FT-IR (cm<sup>-1</sup>): 3257m, 2933m, 2858m, 1697s, 1636s, 1604s, 1502s, 1374m, 1295m, 1174s, 1125m, 768m, 682m.

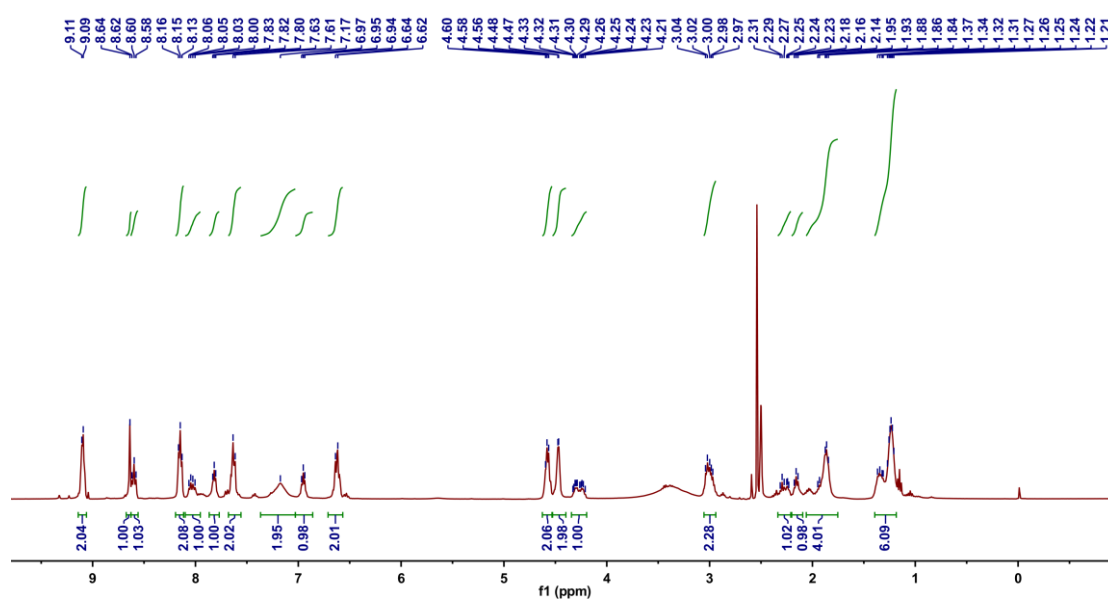

**Figure S15.** <sup>1</sup>H NMR spectrum (400 MHz, DMSO) recorded for FA-Py.

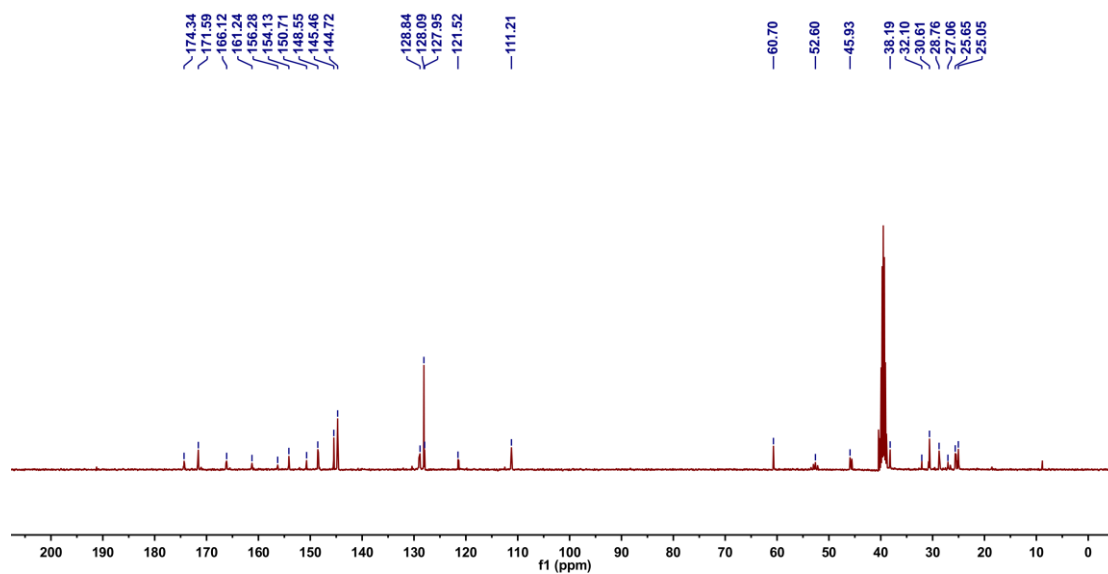

**Figure S16.**  $^{13}\text{C}$  NMR spectrum (100 MHz, DMSO) recorded for FA-Py.

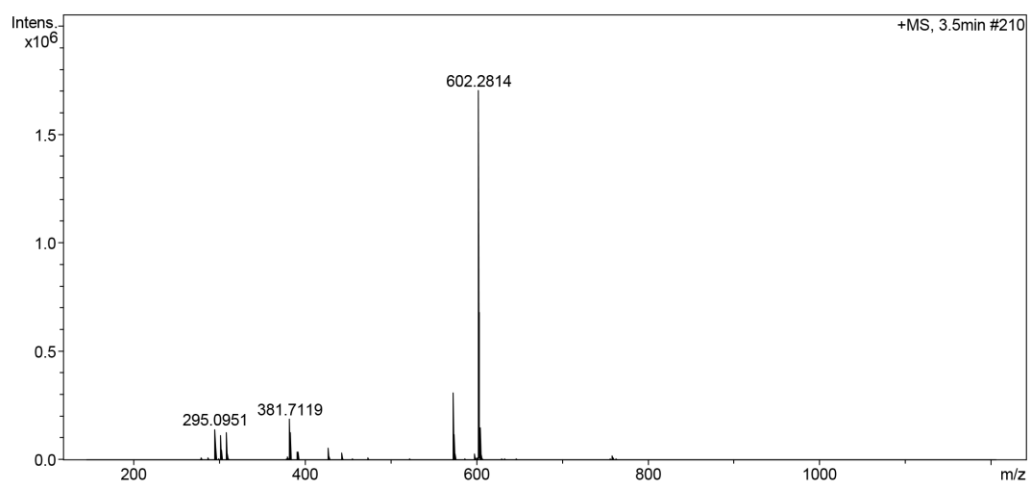

**Figure S17.** Electrospray ionization mass spectrum of FA-Py.

## 2. Host-Guest interaction

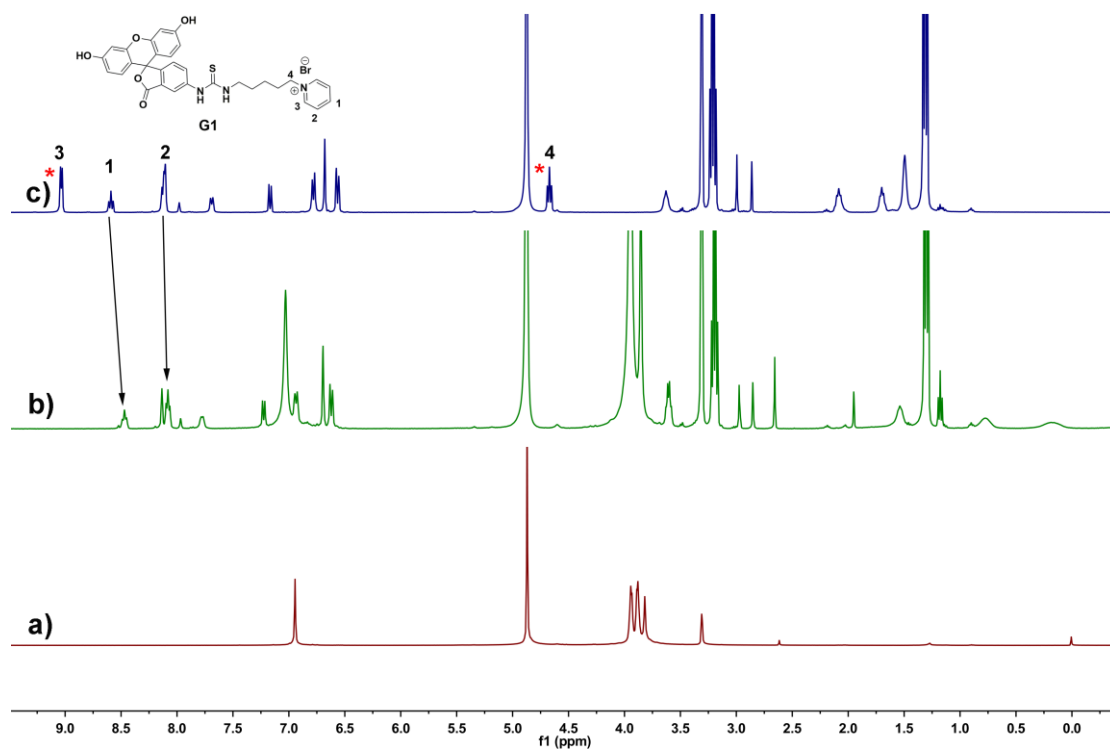

**Figure S18.**  $^1\text{H}$  NMR spectra (400 MHz, MeOD) recorded for a) **1**, b) **1** and FITC-Py (1:1) and c) FITC-Py.

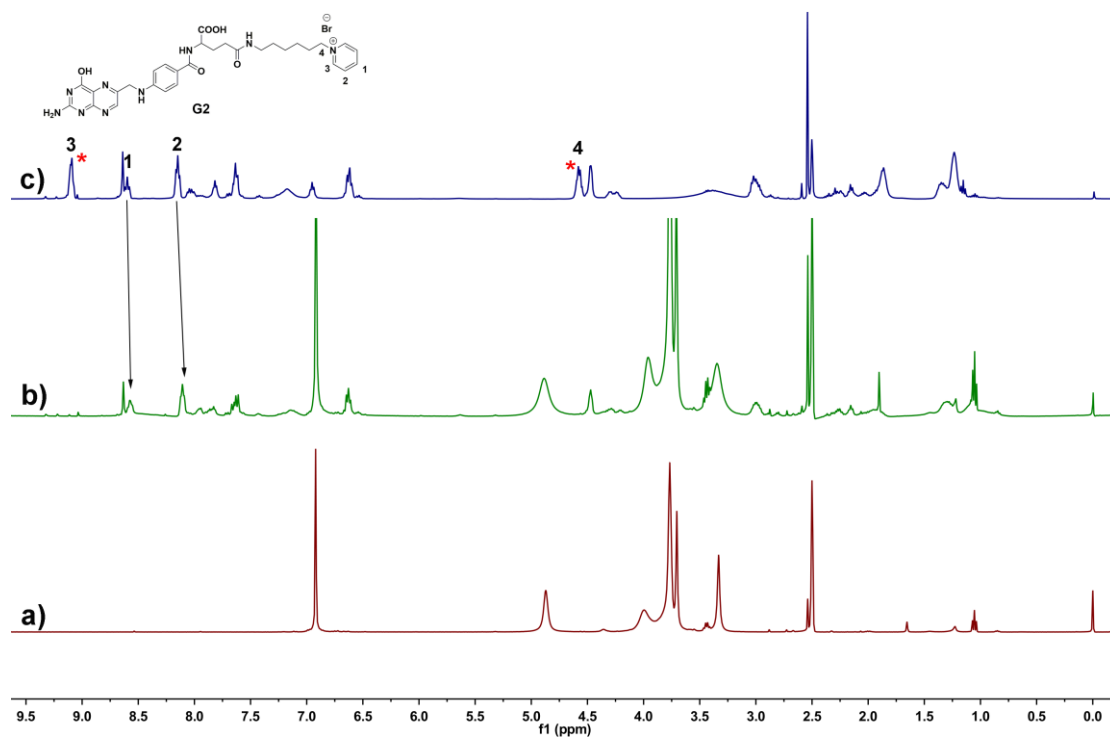

**Figure S19.**  $^1\text{H}$  NMR spectra (400 MHz, DMSO) recorded for a) **1**, b) **1** and FA-Py (1:1) and c) FA-Py.

### 3. FT-IR spectra

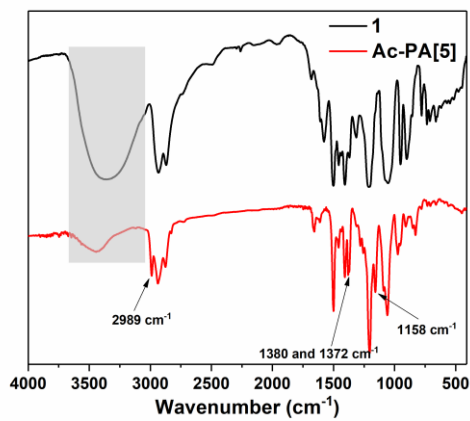

**Figure S20.** FT-IR spectra of **1** and Ac-PA[5].<sup>6</sup>

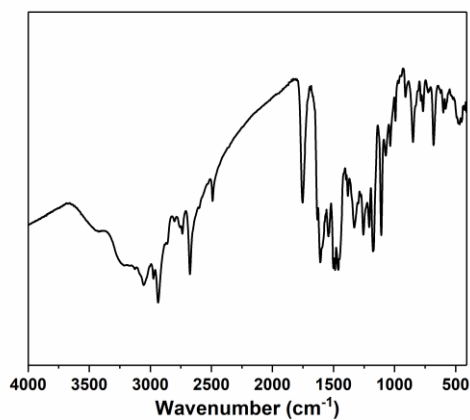

**Figure S21.** FT-IR spectrum of FITC-Py.

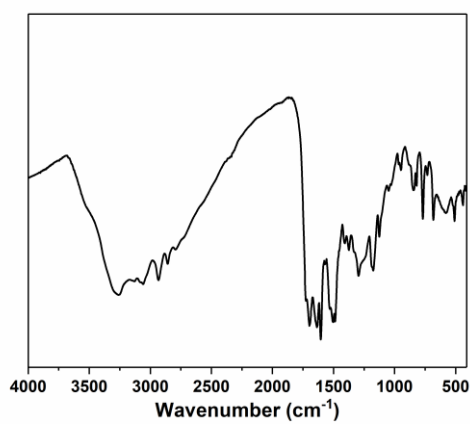

**Figure S22.** FT-IR spectrum of FA-Py.

#### 4. Morphology and size distributions of nanoparticles

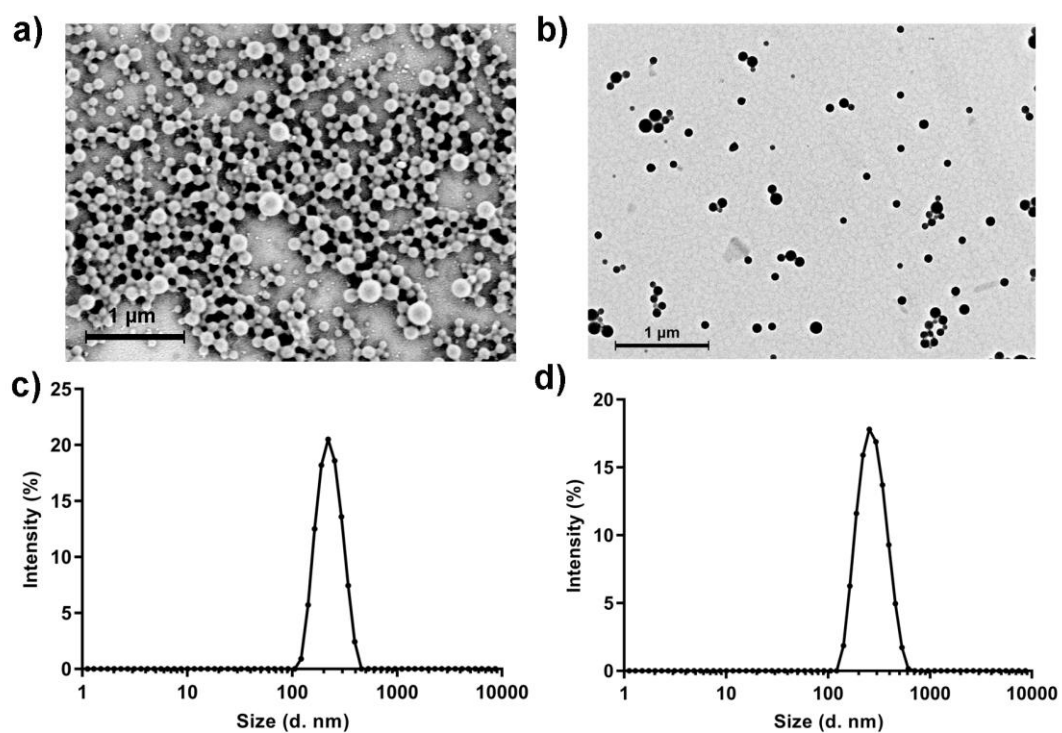

**Figure S23.** a) SEM, b) TEM images and c) size distribution curve of PTX-NPs (PDI = 0.222). d) Size distribution curve of DOX-NPs (PDI = 0.120).



## 5. Time-dependent size change of nanoparticles

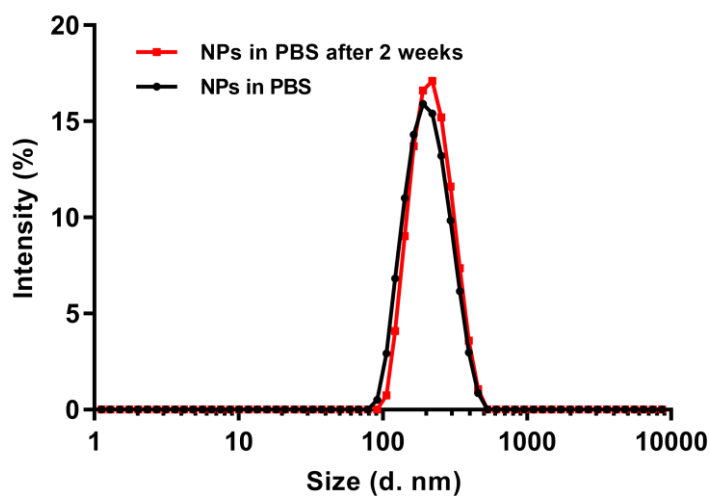

**Figure S24.** Time-dependent size distribution of blank nanoparticles in phosphate buffered saline (PBS). PDI (red line): 0.093.

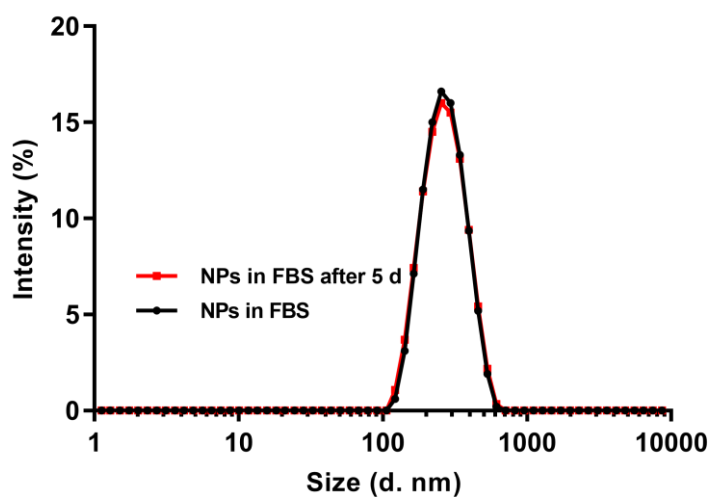

**Figure S25.** Time-dependent size distribution of blank nanoparticles in fetal bovine serum (FBS). PDI (black line): 0.180. PDI (red line): 0.248.

## 6. References

- (1) Hu, X. B.; Chen, L.; Si, W.; Yu, Y.; Hou, J. L. Pillar[5]arene decaamine: Synthesis, encapsulation of very long linear diacids and formation of ion pair-stopped [2]rotaxanes. *Chem. Commun.* **2011**, 47 (16), 4694.
- (2) Bachelder, E. M.; Beaudette, T. T.; Broaders, K. E.; Dashe, J.; Fréchet, J. M. J. Acetal-derivatized dextran: an acid-responsive biodegradable material for therapeutic applications. *J. Am. Chem. Soc.* **2008**, 130 (32), 10494.
- (3) Ding, C. Di; Liu, Y.; Wang, T.; Fu, J. J. Triple-stimuli-responsive nanocontainers assembled by water-soluble pillar[5]arene-based pseudorotaxanes for controlled release. *J. Mater. Chem. B* **2016**, 4 (16), 2819.
- (4) Hennig, A.; Borcharding, H.; Jaeger, C.; Hatami, S.; Würth, C.; Hoffmann, A.; Hoffmann, K.; Thiele, T.; Schedler, U.; Resch-Genger, U. Scope and limitations of surface functional group quantification methods: exploratory study with poly(acrylic acid)-grafted micro- and nanoparticles. *J. Am. Chem. Soc.* **2012**, 134 (19), 8268.
- (5) Liu, Y.; Dai, Z.; Wang, J.; Tu, Y.; Zhu, L. Folate-targeted pH-sensitive bortezomib conjugates for cancer treatment. *Chem. Commun.* **2019**, 55 (29), 4254.
- (6) Zhang, J.; Jia, Y.; Li, X.; Hu, Y.; Li, X. Facile engineering of biocompatible materials with pH-modulated degradability. *Adv. Mater.* **2011**, 23 (27), 3035.
